# Supplementary material
Source: publisher figshare collection journal article supplement (https://frontiersin.figshare.com/ndownloader/files/35023957)
Supplement: Supplementary file 1 [file 35023957]

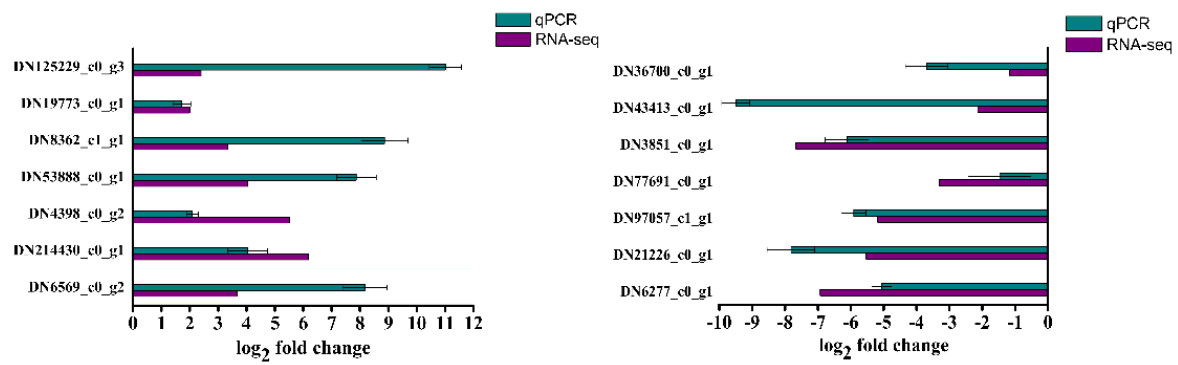

**Supplementary Figure 6. Verification transcriptome data by qRT-PCR.** The RNA-seq data were shown on purple columns and the qRT-PCR data were shown on green columns.
